# Supplementary material
Source: Royal Society of Chemistry journal article supplement (doi:10.1039/d6tb01003b)
Supplement: d6tb01003b1.pdf [file d6tb01003b1.pdf]

## Supporting Information

**Table S1** Primer sequences used in qRT-PCR.

| Species | Gene          | Sequence (5'→3')                   |
|---------|---------------|------------------------------------|
| Mice    | <i>Gadph</i>  | AGGTCGGTGTGAACGGATTTG (forward)    |
|         |               | TGTAGACCATGTAGTTGAGGTCA (reverse)  |
| Mice    | <i>Il-1β</i>  | TGGTGTGTGACGTTCCC (forward)        |
|         |               | TGTCCATTGAGGTGGAGAG (reverse)      |
| Mice    | <i>Il-6</i>   | TTCACAAGTCGGAGGCTTA (forward)      |
|         |               | CAAGTGCATCATCGTTGTTC (reverse)     |
| Mice    | <i>iNOS</i>   | ACGCTTCACTTCCAATGCAAC (forward)    |
|         |               | CAGCCTCATGGTAAACACGTTC (reverse)   |
| Mice    | <i>Tnf-α</i>  | CGCTGAGGTCAATCTGC (forward)        |
|         |               | GGCTGGGTAGAGAATGGA (reverse)       |
| Rat     | <i>Gadph</i>  | GGCACAGTCAAGGCTGAGAATG (forward)   |
|         |               | ATGGTGGTGAAGACGCCAGTA (reverse)    |
| Rat     | <i>Il-1β</i>  | AAGCTCTCCACCTCAATGGAC (forward)    |
|         |               | GTGCCGTCTTTCATCACACAG (reverse)    |
| Rat     | <i>Il-6</i>   | ATTGTATGAACAGCGATGATGCAC (forward) |
|         |               | CCAGGTAGAAACGGAActCCAGA (reverse)  |
| Rat     | <i>Il-17a</i> | GTCCTCAACTCCCTTAGCTCAA (forward)   |
|         |               | CCTCCAGATCACAGAAGGATATC (reverse)  |
| Rat     | <i>iNOS</i>   | CTTGGAGCGAGTTGTGGATTG (forward)    |
|         |               | CCTCTTGTCTTTGACCCAGTAGC (reverse)  |
| Human   | <i>GAPDH</i>  | GATTCCACCCATGGCAAATTC (forward)    |
|         |               | CTGGAAGATGGTGATGGGATT (reverse)    |
| Human   | <i>BSP</i>    | GAACCACTTCCCCACCTTTTG (forward)    |
|         |               | ATTCTGACCATCATAGCCATCG (reverse)   |
| Human   | <i>ALP</i>    | TAAGGACATCGCCTACCAGCTC (forward)   |
|         |               | TCTTCCAGGTGTCAACGAGGT (reverse)    |

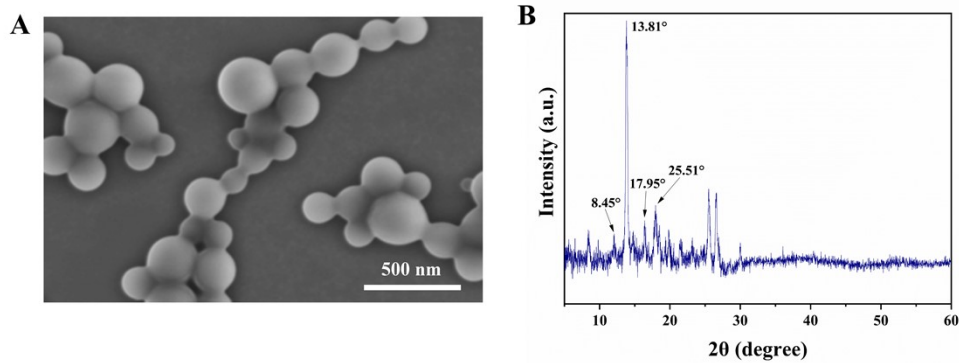

**Figure S1.** (A) SEM image and (B) XRD pattern of nano-curcumin (nCur).

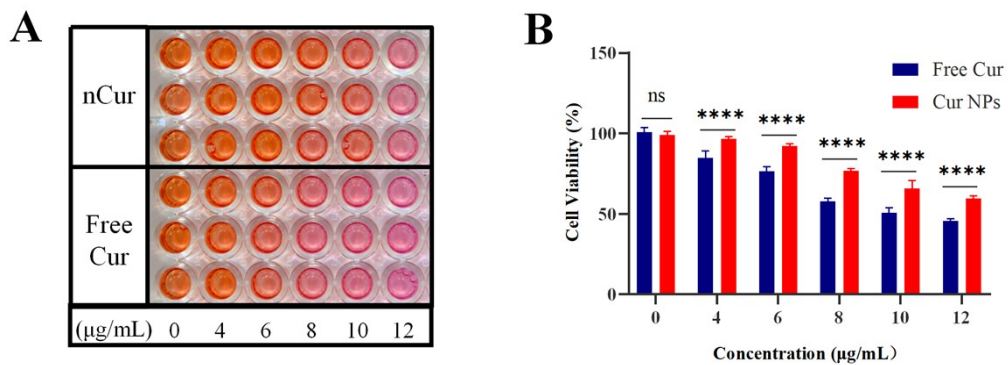

**Figure S2.** (A) Digital photographs of CCK-8 assay in RAW264.7 cells after 24 h incubation with different concentrations of curcumin. (B) Cell viability of hPDLs after 24 h incubation with various concentrations of curcumin. Data are represented as mean  $\pm$  SD (n=3). \*\*\*\* $p$  < 0.0001.

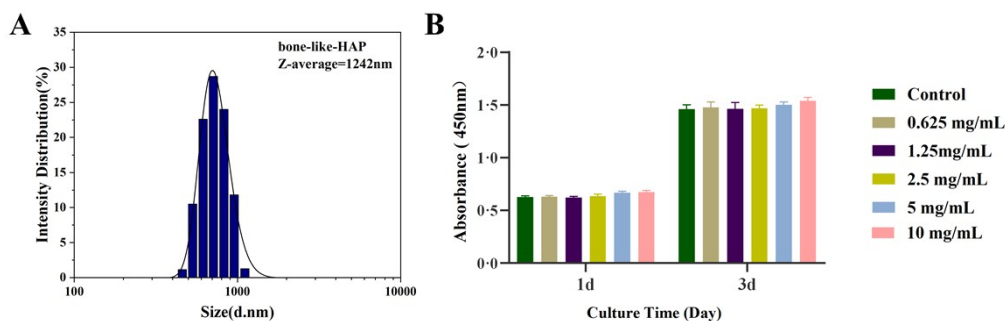

**Figure S3.** (A) Size distribution of bone-like HAP. (B) CCK-8 assay of RAW264.7 cells after treatment with bone-like HAP for 1 day and 3 days. Data are represented as

mean  $\pm$  SD (n=3).

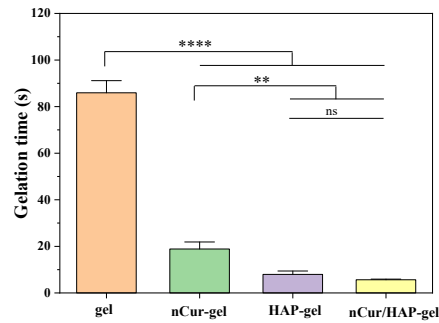

**Figure S4.** Quantitative analysis of gelation time. Data are represented as mean  $\pm$  SD (n=3). \*\* $p < 0.01$ , \*\*\*\* $p < 0.0001$ .

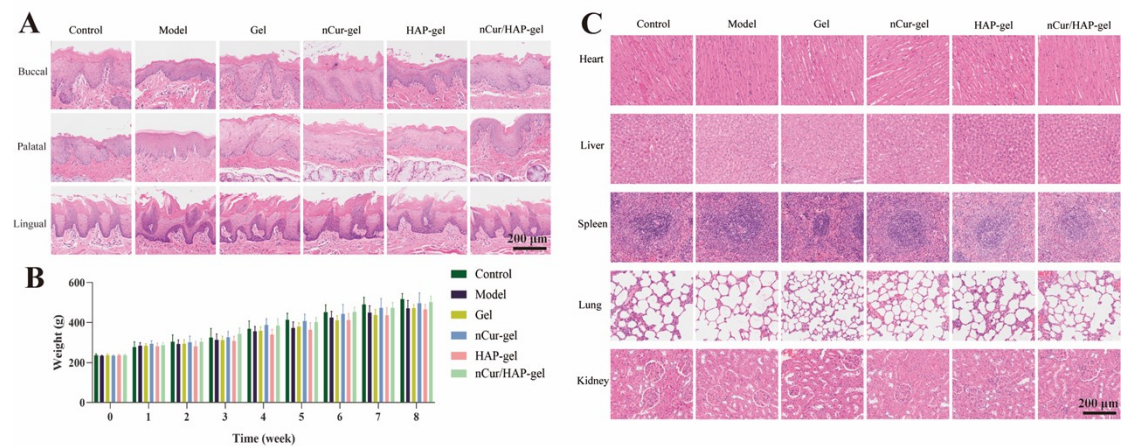

**Figure S5.** *In vivo* biocompatibility of the hydrogels. (A) Representative H&E-stained images of the buccal mucosa, palatal mucosa, and tongue mucosa (n=3). (B) Changes in body weight of rats (n=6). (C) Representative H&E-stained images of major organs (heart, liver, spleen, lung, and kidney) (n=3). Data are represented as mean  $\pm$  SD.

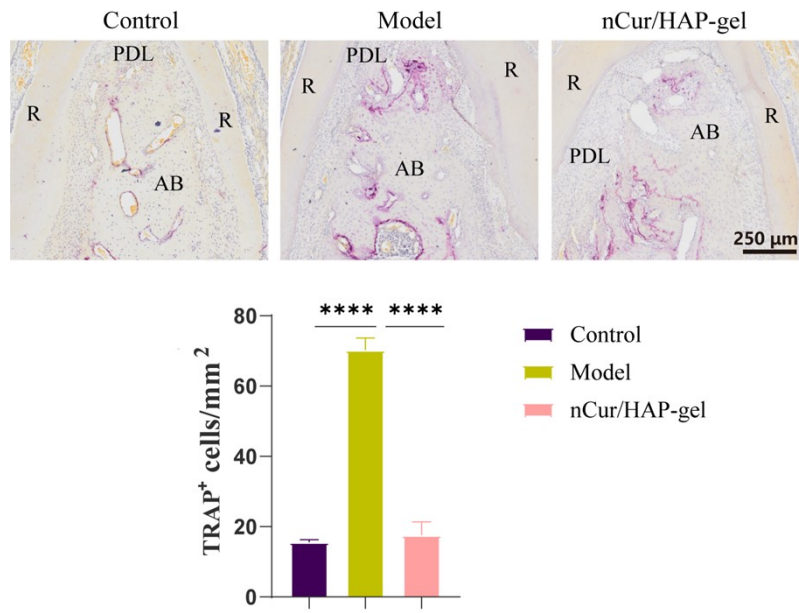

**Figure S6.** Representative images of tartrate-resistant acid phosphatase (TRAP) staining and statistical analysis of TRAP-positive cells. R: root; PDL: periodontal ligament; AB: alveolar bone. Data are represented as mean  $\pm$  SD (n=3). \*\*\*\*  $p < 0.0001$ .
